# Supplementary material for: The molecular basis, genetic control and pleiotropic effects of local gene co-expression
Source: PubMed Central journal article supplement (PMC8355184; doi:10.1038/s41467-021-25129-x), 2021-08-10
Supplement: 41467_2021_25129_MOESM3_ESM.pdf [file 41467_2021_25129_MOESM3_ESM.pdf]

### **Description of Additional Supplementary Files**

File Name: Supplementary Data 1

Description: List of eQTL-COP-tissue combinations that affect multiple traits generated in this study
